# Supplementary material
Source: publisher figshare collection journal article supplement (https://acs.figshare.com/ndownloader/files/4232413)
Supplement: Supplementary file 1 [file 4232413]

## Supporting information

### Theoretical study of the mechanism of proton transfer in the esterase EstB from *Burkholderia gladioli*

Liang Chen<sup>1,2#</sup>, Xiangqian Kong<sup>1#</sup>, Zhongjie Liang<sup>1</sup>, Fei Ye<sup>1</sup>, Kunqian Yu<sup>1</sup>, Weiyi Dai<sup>2</sup>, Daocheng Wu<sup>2\*</sup>, Cheng Luo<sup>1,3\*</sup>, and Hualiang Jiang<sup>1</sup>

<sup>1</sup>Drug Discovery and Design Center, State Key Laboratory of Drug Research, Shanghai Institute of Materia Medica, Chinese Academy of Sciences, Shanghai 201203, China

<sup>2</sup>The Key Laboratory of Biomedical Information Engineering of the Ministry of Education, School of Life Science and Technology, Xi'an Jiaotong University, Xi'an 710049, China

<sup>3</sup>Center for Systems Biology, Soochow University, Jiangsu 215006, China

<sup>#</sup>These authors contributed equally to this work

<sup>\*</sup>Correspondence: Daocheng Wu and Cheng Luo

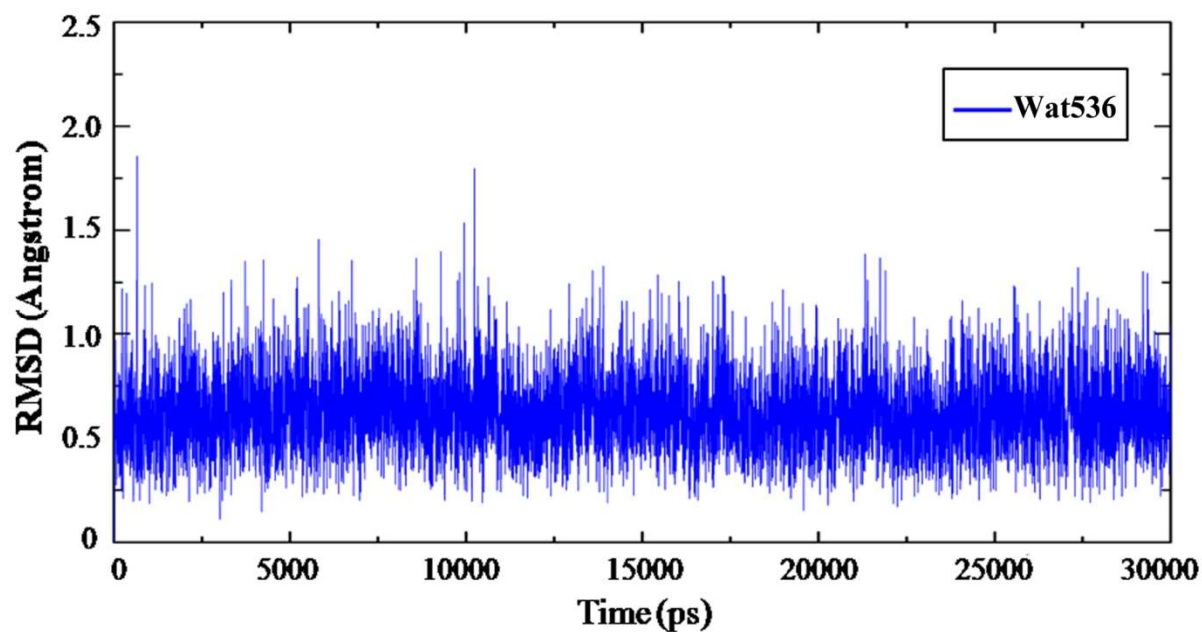

**Figure S1.** Time dependencies of the weighted root-mean-square deviations for Wat536 from their initial positions during the 30-ns simulation.

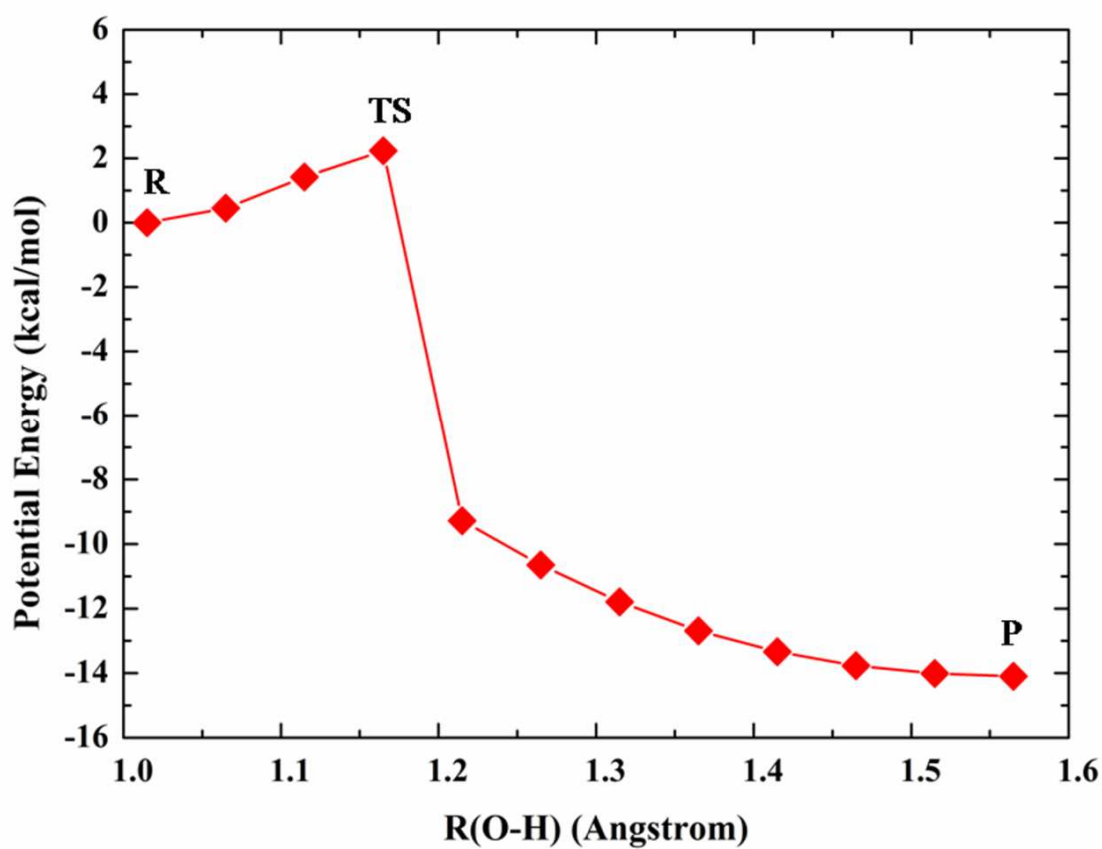

**Figure S2.** Potential energy curve for the PT reaction in EstB determined at the

ONIOM (B3LYP/6-31G\*:AMBER) level. (R) is the reactant; (TS) is the transition state; (P) is the immediate product. All of the stationary points of potential energy along the PT pathway are marked with filled squares.

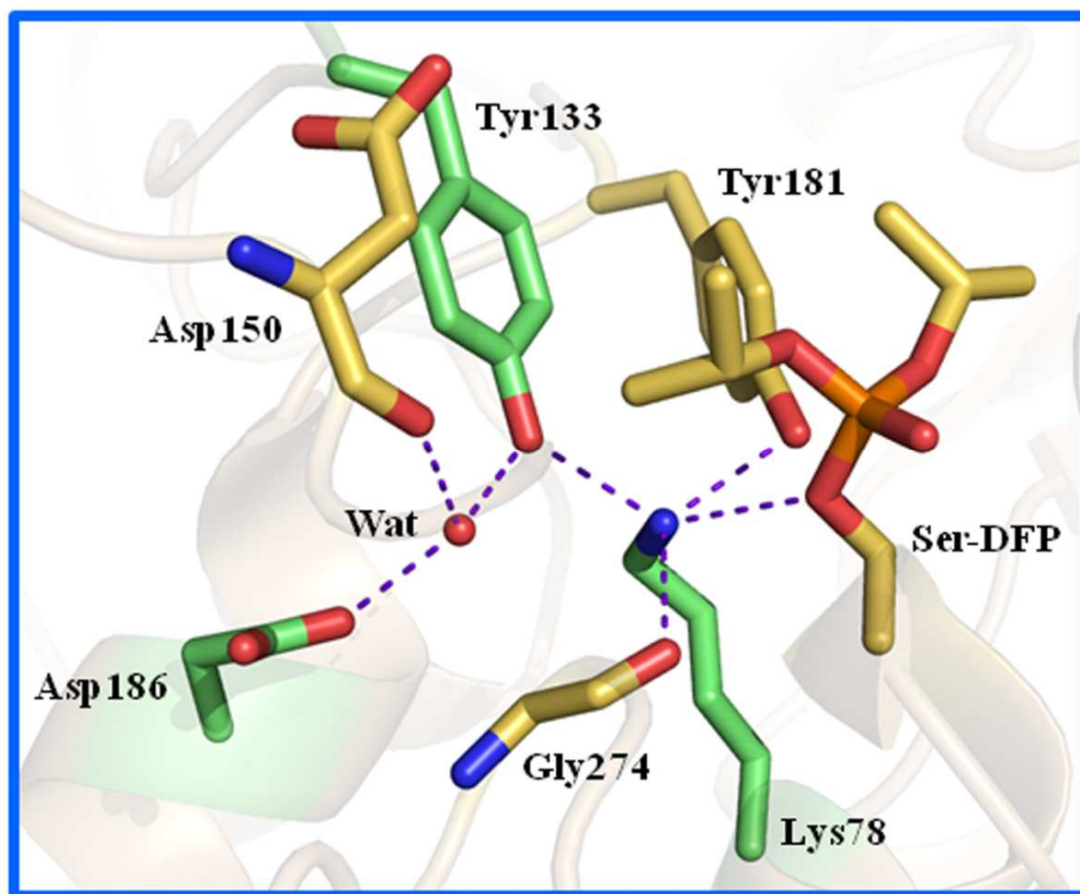

**Figure S3.** Stereoview of the hydrogen bonding network surrounding the water molecule in the EstB-DFP complex. (PDB code: 1CI9, chain B).

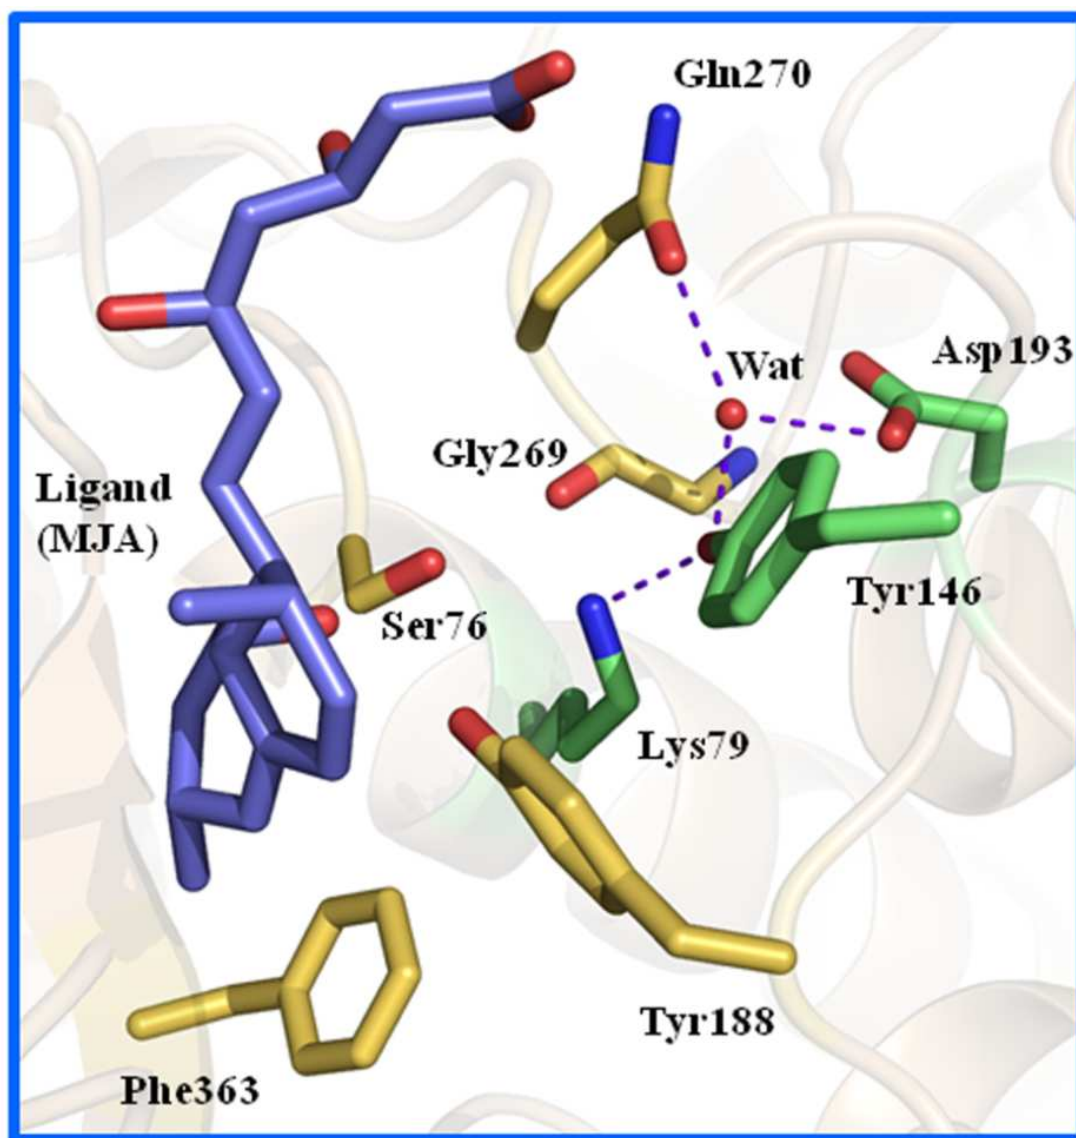

**Figure S4.** Active site residues and the water molecule in the LovD-MJA complex (PDB code: 3HLD).
